# Supplementary material for: Multimodal imaging of synaptic vesicles with a single probe
Source: PubMed Central journal article supplement — Cell Rep Methods. 2022 Apr 25;2(4):100199. doi: 10.1016/j.crmeth.2022.100199 (PMC9046237; doi:10.1016/j.crmeth.2022.100199), 2022-04-25
Supplement: mmc1.pdf [file mmc1.pdf]

**Cell Reports Methods, Volume 2**

**Supplemental information**

**Multimodal imaging of synaptic  
vesicles with a single probe**

**Seong J. An, Massimiliano Stagi, Travis J. Gould, Yumei Wu, Michael Mlodzianoski, Felix Rivera-Molina, Derek Toomre, Stephen M. Strittmatter, Pietro De Camilli, Joerg Bewersdorf, and David Zenisek**

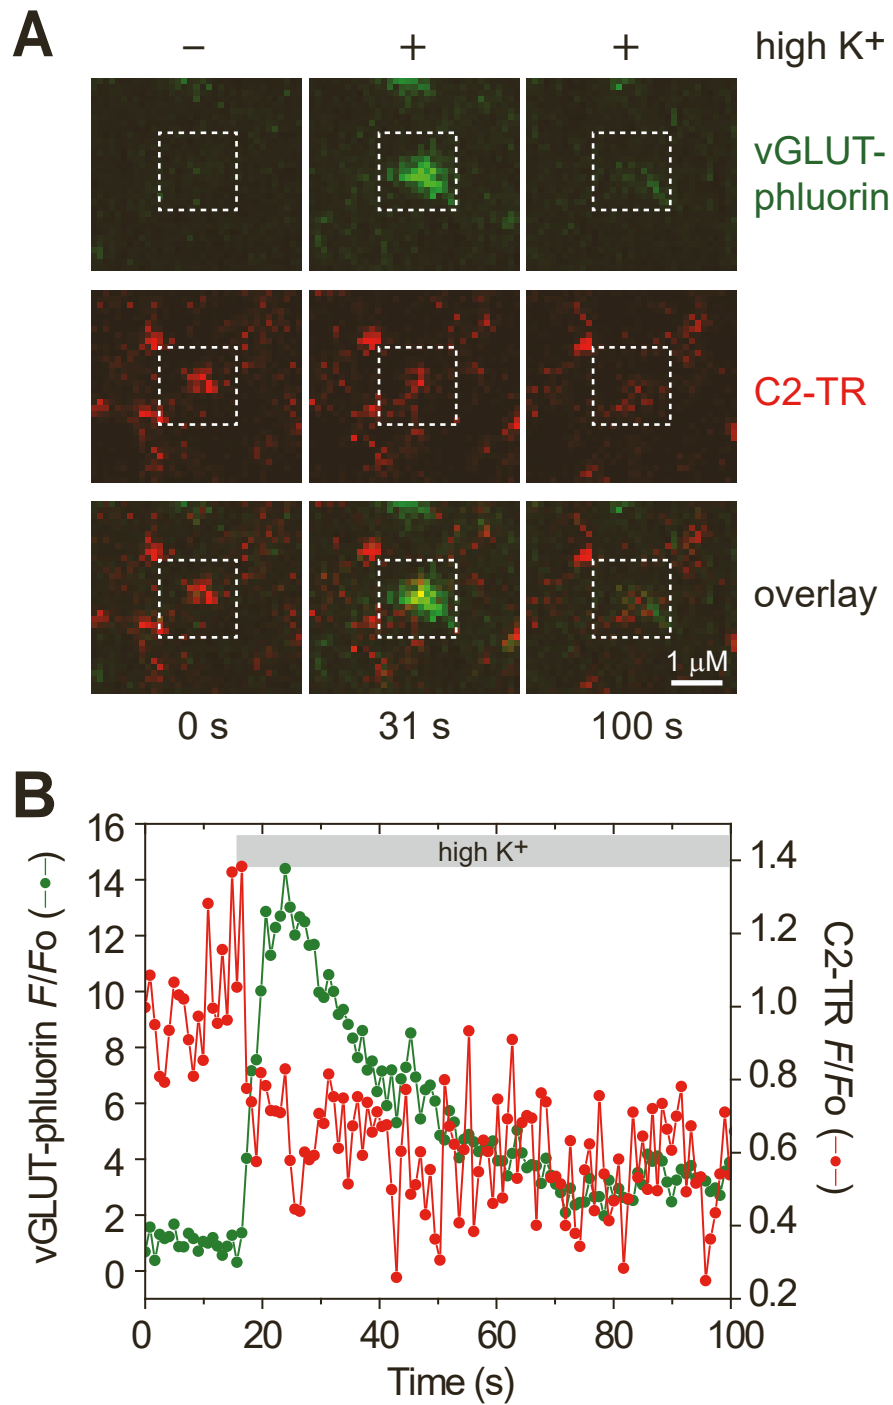

**Figure S1. Stimulation-dependent changes in C2-TR and vGLUT-pHluorin fluorescence of an individual presynaptic terminal, related to Figure 2.**

(A) Confocal images of hippocampal neurons expressing vGLUT-pHluorin and labeled with 1 mM C2-TR, before and during high K<sup>+</sup> stimulation. (B) Time course of fluorescence intensity ( $F$ ) normalized to initial fluorescence ( $F_0$ ) of the presynaptic terminal in the white dashed box in (A).

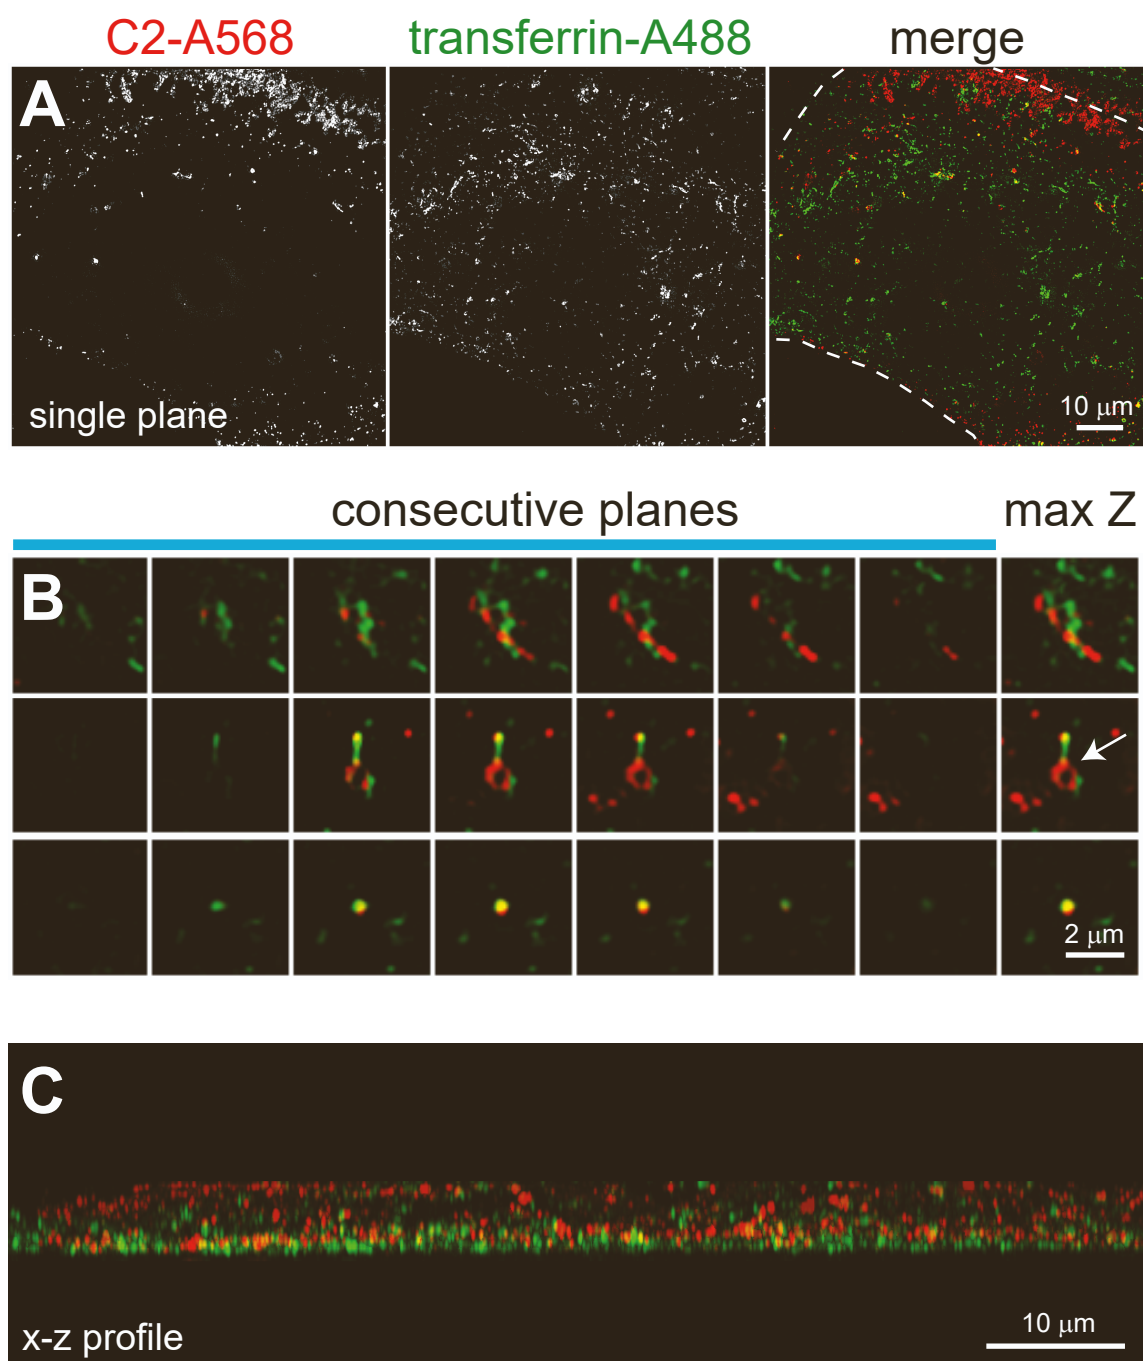

**Figure S2. Endocytic internalization of C2-Alexa568 and transferrin-Alexa488 in HeLa cells, related to Figure 1.**

(A) HeLa cells were starved for 2 h and incubated with 1 mM C2-Alexa568 and 10 mg/mL transferrin-Alexa488 for 30 min in serum-free media, washed and fixed with 4% paraformaldehyde. Cells were then imaged by structured-illumination microscopy. Dashed white line, cell outline. (B) Consecutive planes and maximum intensity projection of selected individual structures within the cell at a higher magnification. Note partial overlap of C2-Alexa-568 and transferrin-Alexa488 labeling in one structure (white arrow). (C) x-z profile section of the cell.

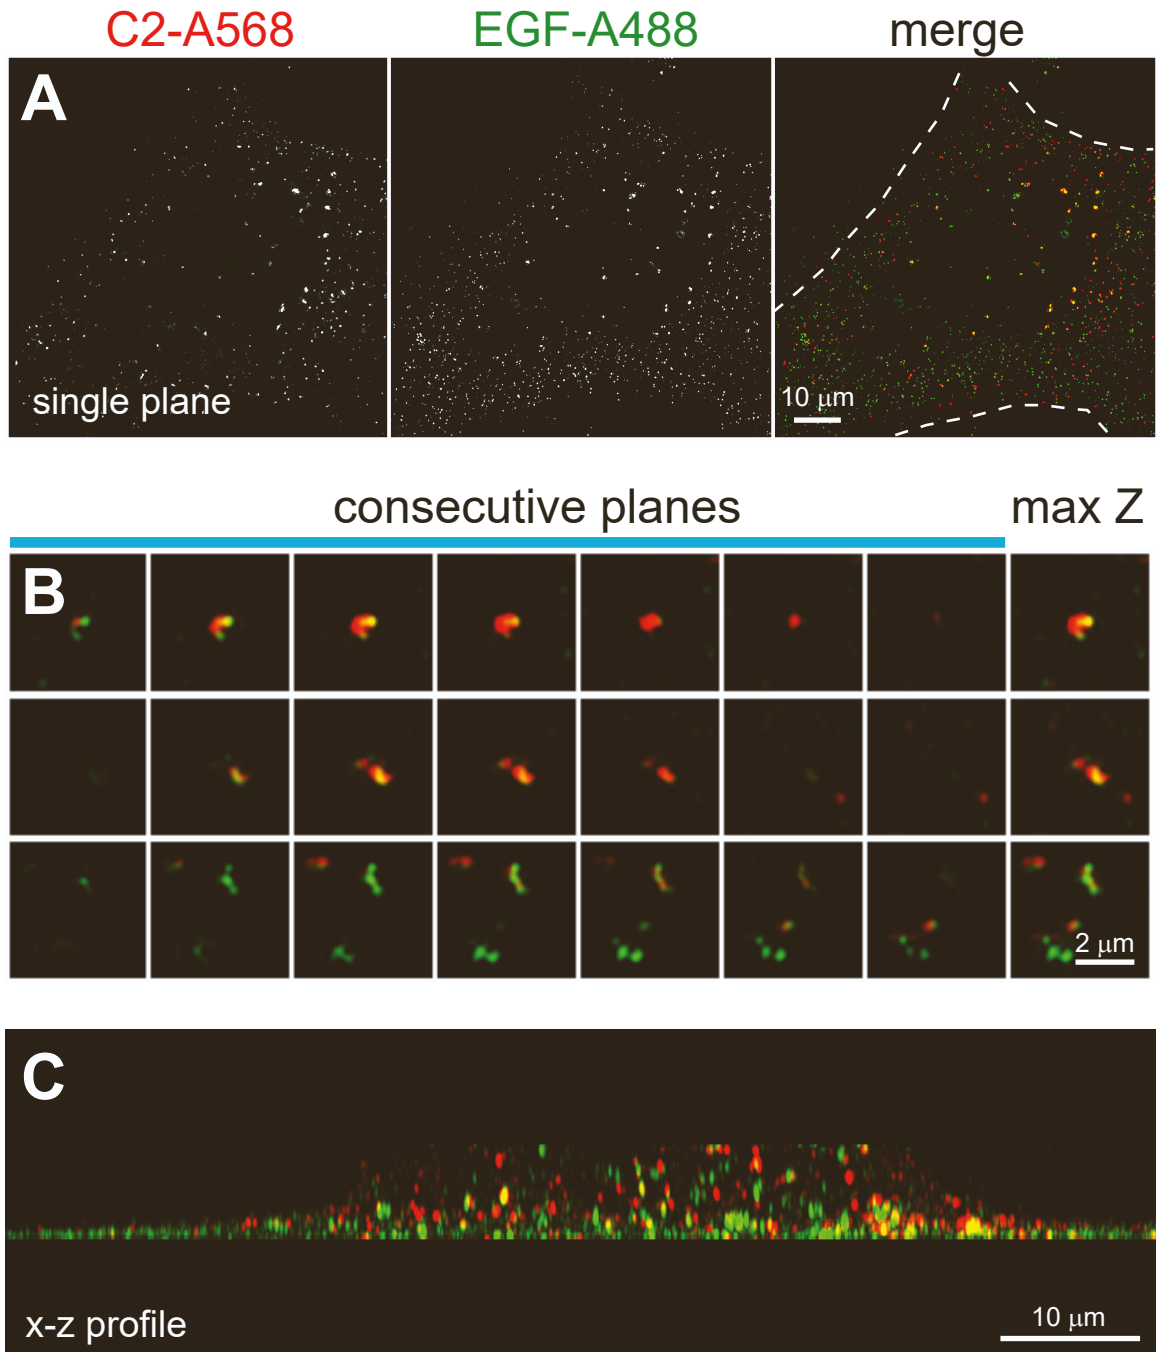

**Figure S3. Endocytic internalization of C2-Alexa568 and EGF-Alexa488 in HeLa cells, related to Figure 1.** (A) HeLa cells were starved for 2 h and incubated with 1 mM C2-Alexa568 and 100 ng/mL EGF-Alexa488 for 30 min in serum-free media, washed and fixed with 4% paraformaldehyde. Cells were then imaged by structured-illumination microscopy. Dashed white line, cell outline. (B) Consecutive planes and maximum intensity projection of selected individual structures within the cell at a higher magnification. (C) x-z profile section of the cell.
